# Supplementary material for: Comprehensive Analysis of 11 Species of Euodia (Rutaceae) by Untargeted LC-IT-TOF/MS Metabolomics and In Vitro Functional Methods
Source: MDPI journal article supplement (doi:10.3390/molecules29051059), 2024-02-28
Supplement: s1 [file s1]

**Table S1.** 192 differential metabolites in *Evodia*

| Class I   | Class II                           | Compounds               | Species                                                                                                                                                                                                              | Molecular Weight | Rt (min)     | Formula                                                       | Ionization model   |
|-----------|------------------------------------|-------------------------|----------------------------------------------------------------------------------------------------------------------------------------------------------------------------------------------------------------------|------------------|--------------|---------------------------------------------------------------|--------------------|
| Alkaloids | Indole<br>quinazoline<br>alkaloids | evoxanthidine           | <i>E.rutaecarpa</i>                                                                                                                                                                                                  | 270.09549        | 1.02170      | C <sub>15</sub> H <sub>11</sub> NO <sub>4</sub>               | [M+H] <sup>+</sup> |
| Alkaloids | Indole<br>quinazoline<br>alkaloids | 7,8-dehydrorutaecarpine | <i>E.ailanthifolia</i> , <i>E.austrosinensis</i> ,<br><i>E.compacta</i> , <i>E.daniellii</i> , <i>E.fargesii</i> ,<br><i>E.fraxinifolia</i> , <i>E.glabrifolia</i> , <i>E.rutaecarpa</i> ,<br><i>E.sutchuenensis</i> | 286.10168        | 9.32874      | C <sub>18</sub> H <sub>11</sub> N <sub>3</sub> O              | [M+H] <sup>+</sup> |
| Alkaloids | Indole<br>quinazoline<br>alkaloids | isoevodiamine           | <i>E.delavayi</i> , <i>E.rutaecarpa</i>                                                                                                                                                                              | 288.09169        | 16.6449<br>3 | C <sub>18</sub> H <sub>13</sub> N <sub>3</sub> O              | [M+H] <sup>+</sup> |
| Alkaloids | Indole<br>quinazoline<br>alkaloids | pseudorutaecarpine      | <i>E.compacta</i> , <i>E.delavayi</i>                                                                                                                                                                                | 288.10489        | 1.31414      | C <sub>18</sub> H <sub>13</sub> N <sub>3</sub> O              | [M+H] <sup>+</sup> |
| Alkaloids | Indole<br>quinazoline<br>alkaloids | rutaecarpine            | <i>E.sutchuenensis</i>                                                                                                                                                                                               | 288.10489        | 4.00941      | C <sub>18</sub> H <sub>13</sub> N <sub>3</sub> O              | [M+H] <sup>+</sup> |
| Alkaloids | Indole<br>quinazoline<br>alkaloids | wuzhuyurutine A         | <i>E.austrosinensis</i> , <i>E.compacta</i> , <i>E.fargesii</i> ,<br><i>E.glabrifolia</i> , <i>E.lepta</i> , <i>E.rutaecarpa</i>                                                                                     | 290.08859        | 0.89975      | C <sub>17</sub> H <sub>11</sub> N <sub>3</sub> O <sub>2</sub> | [M+H] <sup>+</sup> |
| Alkaloids | Indole<br>quinazoline<br>alkaloids | dimethyl evodiamide     | <i>E.ailanthifolia</i> , <i>E.austrosinensis</i> ,<br><i>E.compacta</i> , <i>E.daniellii</i> , <i>E.delavayi</i> ,<br><i>E.fargesii</i> , <i>E.glabrifolia</i> , <i>E.rutaecarpa</i>                                 | 290.13449        | 2.66598      | C <sub>18</sub> H <sub>15</sub> N <sub>3</sub> O              | [M+H] <sup>+</sup> |

| Class I   | Class II                           | Compounds               | Species                                                                                                                                                                                                                                  | Molecular Weight | Rt (min)     | Formula                                                       | Ionization model   |
|-----------|------------------------------------|-------------------------|------------------------------------------------------------------------------------------------------------------------------------------------------------------------------------------------------------------------------------------|------------------|--------------|---------------------------------------------------------------|--------------------|
| Alkaloids | Indole<br>quinazoline<br>alkaloids | evodione                | <i>E.daniellii</i> , <i>E.delavayi</i> , <i>E.glabrifolia</i> ,<br><i>E.lepta</i> , <i>E.rutaecarpa</i>                                                                                                                                  | 293.10248        | 3.97998      | C <sub>16</sub> H <sub>20</sub> O <sub>5</sub>                | [M+H] <sup>+</sup> |
| Alkaloids | Indole<br>quinazoline<br>alkaloids | dimethyl evodiamide     | <i>E.compacta</i> , <i>E.rutaecarpa</i>                                                                                                                                                                                                  | 294.14978        | 0.91878      | C <sub>18</sub> H <sub>19</sub> N <sub>3</sub> O              | [M+H] <sup>+</sup> |
| Alkaloids | Indole<br>quinazoline<br>alkaloids | dehydroevodiamine       | <i>E.ailanthifolia</i> , <i>E.austrosinensis</i> ,<br><i>E.compacta</i> , <i>E.daniellii</i> , <i>E.delavayi</i> ,<br><i>E.fargesii</i> , <i>E.glabrifolia</i> , <i>E.rutaecarpa</i>                                                     | 302.12189        | 28.0664<br>8 | C <sub>19</sub> H <sub>15</sub> N <sub>3</sub> O              | [M+H] <sup>+</sup> |
| Alkaloids | Indole<br>quinazoline<br>alkaloids | N13-methyl-rutaecarpine | <i>E.austrosinensis</i> , <i>E.compacta</i> ,<br><i>E.rutaecarpa</i> , <i>E.sutchuenensis</i>                                                                                                                                            | 302.14679        | 80.2343<br>3 | C <sub>19</sub> H <sub>15</sub> N <sub>3</sub> O              | [M+H] <sup>+</sup> |
| Alkaloids | Indole<br>quinazoline<br>alkaloids | evodiamine              | <i>E.ailanthifolia</i> , <i>E.delavayi</i> , <i>E.rutaecarpa</i>                                                                                                                                                                         | 304.10449        | 10.8611<br>7 | C <sub>19</sub> H <sub>17</sub> N <sub>3</sub> O              | [M+H] <sup>+</sup> |
| Alkaloids | Indole<br>quinazoline<br>alkaloids | 10-hydroxyrutaecarpine  | <i>E.austrosinensis</i> , <i>E.rutaecarpa</i>                                                                                                                                                                                            | 304.10870        | 16.6747<br>2 | C <sub>18</sub> H <sub>13</sub> N <sub>3</sub> O <sub>2</sub> | [M+H] <sup>+</sup> |
| Alkaloids | Indole<br>quinazoline<br>alkaloids | 1-hydroxyrutaecarpine   | <i>E.ailanthifolia</i> , <i>E.austrosinensis</i> ,<br><i>E.compacta</i> , <i>E.daniellii</i> , <i>E.delavayi</i> ,<br><i>E.fargesii</i> , <i>E.fraxinifolia</i> , <i>E.glabrifolia</i> ,<br><i>E.rutaecarpa</i> , <i>E.sutchuenensis</i> | 304.10870        | 23.1252<br>7 | C <sub>18</sub> H <sub>13</sub> N <sub>3</sub> O <sub>2</sub> | [M+H] <sup>+</sup> |
| Alkaloids | Indole<br>quinazoline              | 3-hydroxyrutaecarpine   | <i>E.austrosinensis</i> , <i>E.compacta</i> , <i>E.fargesii</i> ,<br><i>E.fraxinifolia</i> , <i>E.glabrifolia</i> , <i>E.rutaecarpa</i>                                                                                                  | 304.10945        | 15.0104<br>1 | C <sub>18</sub> H <sub>13</sub> N <sub>3</sub> O <sub>2</sub> | [M+H] <sup>+</sup> |

| Class I   | Class II                           | Compounds                        | Species                                                                                                                                       | Molecular Weight | Rt (min)     | Formula                                                       | Ionization model   |
|-----------|------------------------------------|----------------------------------|-----------------------------------------------------------------------------------------------------------------------------------------------|------------------|--------------|---------------------------------------------------------------|--------------------|
|           | alkaloids                          |                                  |                                                                                                                                               |                  |              |                                                               |                    |
| Alkaloids | Indole<br>quinazoline<br>alkaloids | rhetsine                         | <i>E.austrosinensis</i> , <i>E.fargesii</i>                                                                                                   | 304.11775        | 1.53560      | C <sub>19</sub> H <sub>17</sub> N <sub>3</sub> O              | [M+H] <sup>+</sup> |
| Alkaloids | Indole<br>quinazoline<br>alkaloids | wuzhuyurutine B                  | <i>E.ailanthifolia</i> , <i>E.austrosinensis</i> ,<br><i>E.compacta</i> , <i>E.fargesii</i> , <i>E.rutaecarpa</i> ,<br><i>E.sutchuenensis</i> | 306.11029        | 17.2076<br>5 | C <sub>17</sub> H <sub>11</sub> N <sub>3</sub> O <sub>3</sub> | [M+H] <sup>+</sup> |
| Alkaloids | Indole<br>quinazoline<br>alkaloids | wuzhuyurutine D                  | <i>E.rutaecarpa</i> , <i>E.sutchuenensis</i>                                                                                                  | 306.12698        | 0.92159      | C <sub>17</sub> H <sub>11</sub> N <sub>3</sub> O <sub>3</sub> | [M+H] <sup>+</sup> |
| Alkaloids | Indole<br>quinazoline<br>alkaloids | evodiamide                       | <i>E.ailanthifolia</i> , <i>E.austrosinensis</i> ,<br><i>E.daniellii</i> , <i>E.rutaecarpa</i>                                                | 308.11850        | 6.70353      | C <sub>19</sub> H <sub>21</sub> N <sub>3</sub> O              | [M+H] <sup>+</sup> |
| Alkaloids | Indole<br>quinazoline<br>alkaloids | 14- <i>N</i> -formyrutaecarpine  | <i>E.delavayi</i> , <i>E.rutaecarpa</i> , <i>E.sutchuenensis</i>                                                                              | 316.21741        | 16.4200<br>0 | C <sub>19</sub> H <sub>13</sub> N <sub>3</sub> O <sub>2</sub> | [M+H] <sup>+</sup> |
| Alkaloids | Indole<br>quinazoline<br>alkaloids | 14-<br>formyldihydrorutaecarpine | <i>E.austrosinensis</i> , <i>E.rutaecarpa</i> ,<br><i>E.sutchuenensis</i>                                                                     | 318.12180        | 3.81744      | C <sub>19</sub> H <sub>15</sub> N <sub>3</sub> O <sub>2</sub> | [M+H] <sup>+</sup> |
| Alkaloids | Indole<br>quinazoline<br>alkaloids | 1-methoxyrutaecarpine            | <i>E.rutaecarpa</i>                                                                                                                           | 318.12180        | 16.0730<br>2 | C <sub>19</sub> H <sub>15</sub> N <sub>3</sub> O <sub>2</sub> | [M+H] <sup>+</sup> |
| Alkaloids | Indole<br>quinazoline              | hortiacine                       | <i>E.rutaecarpa</i>                                                                                                                           | 318.12180        | 34.1665<br>7 | C <sub>19</sub> H <sub>15</sub> N <sub>3</sub> O <sub>2</sub> | [M+H] <sup>+</sup> |

| Class I   | Class II                           | Compounds                               | Species                                                                                                                                                        | Molecular Weight | Rt (min)     | Formula                                                       | Ionization model   |
|-----------|------------------------------------|-----------------------------------------|----------------------------------------------------------------------------------------------------------------------------------------------------------------|------------------|--------------|---------------------------------------------------------------|--------------------|
|           | alkaloids                          |                                         |                                                                                                                                                                |                  |              |                                                               |                    |
| Alkaloids | Indole<br>quinazoline<br>alkaloids | 1,2-dihydroxyrutaecarpine               | <i>E.ailanthifolia</i> , <i>E.austrosinensis</i> ,<br><i>E.daniellii</i> , <i>E.glabrifolia</i> , <i>E.rutaecarpa</i>                                          | 320.10068        | 16.3515<br>0 | C <sub>18</sub> H <sub>13</sub> N <sub>3</sub> O <sub>3</sub> | [M+H] <sup>+</sup> |
| Alkaloids | Indole<br>quinazoline<br>alkaloids | wuchuyamide III                         | <i>E.ailanthifolia</i> , <i>E.compacta</i> , <i>E.delavayi</i> ,<br><i>E.fargesii</i> , <i>E.glabrifolia</i> , <i>E.rutaecarpa</i> ,<br><i>E.sutchuenensis</i> | 324.12830        | 1.52935      | C <sub>18</sub> H <sub>17</sub> N <sub>3</sub> O <sub>3</sub> | [M+H] <sup>+</sup> |
| Alkaloids | Indole<br>quinazoline<br>alkaloids | evodine                                 | <i>E.rutaecarpa</i>                                                                                                                                            | 330.15628        | 6.32866      | C <sub>18</sub> H <sub>19</sub> NO <sub>5</sub>               | [M+H] <sup>+</sup> |
| Alkaloids | Indole<br>quinazoline<br>alkaloids | euxylophoricine C                       | <i>E.glabrifolia</i> , <i>E.lepta</i> , <i>E.rutaecarpa</i>                                                                                                    | 332.08508        | 8.95835      | C <sub>19</sub> H <sub>13</sub> N <sub>3</sub> O <sub>3</sub> | [M+H] <sup>+</sup> |
| Alkaloids | Indole<br>quinazoline<br>alkaloids | euxylophoricine F                       | <i>E.rutaecarpa</i> , <i>E.sutchuenensis</i>                                                                                                                   | 334.11554        | 4.13329      | C <sub>19</sub> H <sub>15</sub> N <sub>3</sub> O <sub>3</sub> | [M+H] <sup>+</sup> |
| Alkaloids | Indole<br>quinazoline<br>alkaloids | 13 $\beta$ -<br>hydroxymethylevodiamine | <i>E.fargesii</i> , <i>E.glabrifolia</i> , <i>E.rutaecarpa</i>                                                                                                 | 334.21158        | 52.9794<br>2 | C <sub>20</sub> H <sub>19</sub> N <sub>3</sub> O <sub>2</sub> | [M+H] <sup>+</sup> |
| Alkaloids | Indole<br>quinazoline<br>alkaloids | wuchuyamide II                          | <i>E.ailanthifolia</i> , <i>E.compacta</i> , <i>E.daniellii</i> ,<br><i>E.fargesii</i> , <i>E.glabrifolia</i> , <i>E.rutaecarpa</i>                            | 336.11719        | 3.20547      | C <sub>19</sub> H <sub>17</sub> N <sub>3</sub> O <sub>3</sub> | [M+H] <sup>+</sup> |

| Class I   | Class II                           | Compounds                                                     | Species                                                                                                                 | Molecular Weight | Rt (min)     | Formula                                                       | Ionization model   |
|-----------|------------------------------------|---------------------------------------------------------------|-------------------------------------------------------------------------------------------------------------------------|------------------|--------------|---------------------------------------------------------------|--------------------|
| Alkaloids | Indole<br>quinazoline<br>alkaloids | dehydroevodiamine<br>chloride                                 | <i>E.austrosinensis</i> , <i>E.compacta</i> ,<br><i>E.glabrifolia</i> , <i>E.rutaecarpa</i> ,<br><i>E.sutchuenensis</i> | 339.11569        | 3.24757      | C <sub>19</sub> H <sub>16</sub> ClN <sub>3</sub><br>O         | [M+H] <sup>+</sup> |
| Alkaloids | Indole<br>quinazoline<br>alkaloids | carboxyevodiamine                                             | <i>E.austrosinensis</i> , <i>E.compacta</i> , <i>E.fargesii</i> ,<br><i>E.fraxinifolia</i> , <i>E.glabrifolia</i>       | 348.12769        | 2.24740      | C <sub>20</sub> H <sub>17</sub> N <sub>3</sub> O <sub>3</sub> | [M+H] <sup>+</sup> |
| Alkaloids | Indole<br>quinazoline<br>alkaloids | evodioxinine                                                  | <i>E.compacta</i> , <i>E.glabrifolia</i>                                                                                | 316.16611        | 59.2007<br>6 | C <sub>20</sub> H <sub>17</sub> N <sub>3</sub> O              | [M+H] <sup>+</sup> |
| Alkaloids | Indole<br>quinazoline<br>alkaloids | euxylophoricine B                                             | <i>E.glabrifolia</i>                                                                                                    | 346.09949        | 1.54164      | C <sub>20</sub> H <sub>15</sub> N <sub>3</sub> O <sub>3</sub> | [M+H] <sup>+</sup> |
| Alkaloids | Indole<br>quinazoline<br>alkaloids | euxylophoricine E                                             | <i>E.austrosinensis</i> , <i>E.compacta</i> , <i>E.fargesii</i>                                                         | 376.17229        | 1.93245      | C <sub>21</sub> H <sub>17</sub> N <sub>3</sub> O <sub>4</sub> | [M+H] <sup>+</sup> |
| Alkaloids | Indole<br>quinazoline<br>alkaloids | rutaecarpine-2- <i>O</i> -β-D-<br>glucopyranoside             | <i>E.austrosinensis</i> , <i>E.compacta</i> ,<br><i>E.glabrifolia</i> , <i>E.rutaecarpa</i>                             | 466.43848        | 2.80646      | C <sub>24</sub> H <sub>23</sub> N <sub>3</sub> O <sub>7</sub> | [M+H] <sup>+</sup> |
| Alkaloids | Indole<br>quinazoline<br>alkaloids | dievodiamine                                                  | <i>E.compacta</i> , <i>E.fargesii</i>                                                                                   | 603.25208        | 66.7762<br>3 | C <sub>38</sub> H <sub>30</sub> N <sub>6</sub> O <sub>2</sub> | [M+H] <sup>+</sup> |
| Alkaloids | Indole<br>quinazoline<br>alkaloids | (7 <i>R</i> ,8 <i>S</i> )-7-hydroxy-8-<br>ethoxy-rutaecarpine | <i>E.sutchuenensis</i>                                                                                                  | 320.10068        | 34.2787<br>9 | C <sub>18</sub> H <sub>13</sub> N <sub>3</sub> O <sub>3</sub> | [M+H] <sup>+</sup> |

| Class I   | Class II                     | Compounds                                 | Species                                                                                                                                | Molecular Weight | Rt (min) | Formula                                                       | Ionization model   |
|-----------|------------------------------|-------------------------------------------|----------------------------------------------------------------------------------------------------------------------------------------|------------------|----------|---------------------------------------------------------------|--------------------|
| Alkaloids | Indole quinazoline alkaloids | hydroxyevodiamine                         | <i>E.ailanthifolia</i> , <i>E.compacta</i> , <i>E.glabrifolia</i> , <i>E.sutchuenensis</i>                                             | 320.13480        | 5.19086  | C <sub>19</sub> H <sub>17</sub> N <sub>3</sub> O <sub>2</sub> | [M+H] <sup>+</sup> |
| Alkaloids | Indole quinazoline alkaloids | wuchuyamide I                             | <i>E.ailanthifolia</i> , <i>E.daniellii</i> , <i>E.delavayi</i>                                                                        | 352.14819        | 18.28638 | C <sub>19</sub> H <sub>17</sub> N <sub>3</sub> O <sub>4</sub> | [M+H] <sup>+</sup> |
| Alkaloids | Indole quinazoline alkaloids | preskimmianine                            | <i>E.compacta</i> , <i>E.fargesii</i> , <i>E.fraxinifolia</i> , <i>E.glabrifolia</i>                                                   | 304.14200        | 56.92296 | C <sub>17</sub> H <sub>21</sub> NO <sub>4</sub>               | [M+H] <sup>+</sup> |
| Alkaloids | Indole quinazoline alkaloids | euxylophoricine A                         | <i>E.compacta</i> , <i>E.rutaecarpa</i> , <i>E.sutchuenensis</i>                                                                       | 348.12769        | 2.02716  | C <sub>20</sub> H <sub>17</sub> N <sub>3</sub> O <sub>3</sub> | [M+H] <sup>+</sup> |
| Alkaloids | Quinoline alkaloid           | columbamine                               | <i>E.ailanthifolia</i> , <i>E.daniellii</i> , <i>E.fargesii</i> , <i>E.glabrifolia</i> , <i>E.lepta</i>                                | 339.13519        | 7.70203  | C <sub>20</sub> H <sub>20</sub> NO <sub>4</sub>               | [M+H] <sup>+</sup> |
| Alkaloids | Quinoline alkaloid           | chelerythrine chloride                    | <i>E.rutaecarpa</i>                                                                                                                    | 384.14125        | 1.20036  | C <sub>21</sub> H <sub>18</sub> ClNO <sub>4</sub>             | [M+H] <sup>+</sup> |
| Alkaloids | Quinoline alkaloid           | palmatine                                 | <i>E.ailanthifolia</i> , <i>E.compacta</i> , <i>E.daniellii</i> , <i>E.delavayi</i> , <i>E.fargesii</i>                                | 353.17938        | 61.01682 | C <sub>21</sub> H <sub>22</sub> NO <sub>4</sub>               | [M+H] <sup>+</sup> |
| Alkaloids | Quinolone alkaloids          | atanine                                   | <i>E.austrosinensis</i> , <i>E.daniellii</i> , <i>E.glabrifolia</i> , <i>E.rutaecarpa</i>                                              | 244.11909        | 1.16988  | C <sub>15</sub> H <sub>17</sub> NO <sub>2</sub>               | [M+H] <sup>+</sup> |
| Alkaloids | Quinolone alkaloids          | 1-methyl-2-nonyl-4(1 <i>H</i> )-quinolone | <i>E.ailanthifolia</i> , <i>E.austrosinensis</i> , <i>E.fraxinifolia</i> , <i>E.glabrifolia</i> , <i>E.lepta</i> , <i>E.rutaecarpa</i> | 286.09848        | 35.89032 | C <sub>19</sub> H <sub>27</sub> NO                            | [M+H] <sup>+</sup> |
| Alkaloids | Quinolone                    | bouchardatine                             | <i>E.austrosinensis</i> , <i>E.rutaecarpa</i>                                                                                          | 290.08859        | 19.9148  | C <sub>17</sub> H <sub>11</sub> N <sub>3</sub> O <sub>2</sub> | [M+H] <sup>+</sup> |

| Class I   | Class II            | Compounds                                                                  | Species                                                                                                                           | Molecular Weight | Rt (min) | Formula                                         | Ionization model   |
|-----------|---------------------|----------------------------------------------------------------------------|-----------------------------------------------------------------------------------------------------------------------------------|------------------|----------|-------------------------------------------------|--------------------|
|           | alkaloids           |                                                                            |                                                                                                                                   |                  | 9        |                                                 |                    |
| Alkaloids | Quinolone alkaloids | 1-methyl-2-decyl-4(1 <i>H</i> )-quinolone                                  | <i>E.fargesii</i> , <i>E.fraxinifolia</i> , <i>E.glabrifolia</i> , <i>E.rutaecarpa</i>                                            | 300.32364        | 17.1407  | C <sub>20</sub> H <sub>29</sub> NO              | [M+H] <sup>+</sup> |
| Alkaloids | Quinolone alkaloids | 1-methyl-2-[( <i>Z</i> )-5-undecenyl]-4(1 <i>H</i> )-quinolone             | <i>E.austrosinensis</i> , <i>E.compacta</i> , <i>E.daniellii</i> , <i>E.fargesii</i> , <i>E.glabrifolia</i> , <i>E.rutaecarpa</i> | 312.22290        | 40.2957  | C <sub>21</sub> H <sub>29</sub> NO              | [M+H] <sup>+</sup> |
| Alkaloids | Quinolone alkaloids | 1-methyl-2-undecyl-4(1 <i>H</i> )-quinolone                                | <i>E.austrosinensis</i> , <i>E.daniellii</i> , <i>E.fargesii</i> , <i>E.glabrifolia</i> , <i>E.rutaecarpa</i>                     | 314.25079        | 62.7489  | C <sub>21</sub> H <sub>31</sub> NO              | [M+H] <sup>+</sup> |
| Alkaloids | Quinolone alkaloids | 1-methyl-2-[6-carbonyl-( <i>E</i> )-4-undecenyl]-4(1 <i>H</i> )-quinolone  | <i>E.fargesii</i> , <i>E.rutaecarpa</i>                                                                                           | 326.24640        | 54.2973  | C <sub>21</sub> H <sub>27</sub> NO <sub>2</sub> | [M+H] <sup>+</sup> |
| Alkaloids | Quinolone alkaloids | 1-methyl-2-dodecyl-4(1 <i>H</i> )-quinolone                                | <i>E.austrosinensis</i> , <i>E.daniellii</i> , <i>E.fargesii</i> , <i>E.glabrifolia</i> , <i>E.rutaecarpa</i>                     | 328.07730        | 44.4380  | C <sub>22</sub> H <sub>33</sub> NO              | [M+H] <sup>+</sup> |
| Alkaloids | Quinolone alkaloids | 1-methyl-2-[( <i>Z</i> )-7-tridecenyl]-4(1 <i>H</i> )-quinolone            | <i>E.austrosinensis</i> , <i>E.fargesii</i> , <i>E.glabrifolia</i> , <i>E.rutaecarpa</i>                                          | 340.25179        | 60.6724  | C <sub>23</sub> H <sub>33</sub> NO              | [M+H] <sup>+</sup> |
| Alkaloids | Quinolone alkaloids | evocarpine                                                                 | <i>E.austrosinensis</i> , <i>E.fargesii</i> , <i>E.glabrifolia</i> , <i>E.rutaecarpa</i>                                          | 340.26169        | 65.1159  | C <sub>23</sub> H <sub>33</sub> NO              | [M+H] <sup>+</sup> |
| Alkaloids | Quinolone alkaloids | dihydroevocarpine                                                          | <i>E.austrosinensis</i> , <i>E.fargesii</i> , <i>E.glabrifolia</i> , <i>E.rutaecarpa</i>                                          | 342.27048        | 54.3059  | C <sub>23</sub> H <sub>35</sub> NO              | [M+H] <sup>+</sup> |
| Alkaloids | Quinolone alkaloids | 1-methyl-2-[6-carbonyl-( <i>E</i> )-7-tridecenyl]-4(1 <i>H</i> )-quinolone | <i>E.austrosinensis</i> , <i>E.glabrifolia</i>                                                                                    | 354.22998        | 46.9021  | C <sub>23</sub> H <sub>31</sub> NO <sub>2</sub> | [M+H] <sup>+</sup> |

| Class I   | Class II            | Compounds                                                                           | Species                                                                                                                                                                                             | Molecular Weight | Rt (min)     | Formula                                         | Ionization model   |
|-----------|---------------------|-------------------------------------------------------------------------------------|-----------------------------------------------------------------------------------------------------------------------------------------------------------------------------------------------------|------------------|--------------|-------------------------------------------------|--------------------|
| Alkaloids | Quinolone alkaloids | evoprenine                                                                          | <i>E.compacta</i> , <i>E.daniellii</i> , <i>E.delavayi</i> ,<br><i>E.fargesii</i> , <i>E.fraxinifolia</i> , <i>E.glabrifolia</i> ,<br><i>E.lepta</i> , <i>E.rutaecarpa</i> , <i>E.sutchuenensis</i> | 355.18329        | 52.4074<br>9 | C <sub>21</sub> H <sub>24</sub> NO <sub>4</sub> | [M+H] <sup>+</sup> |
| Alkaloids | Quinolone alkaloids | 1-methyl-2-tetradecyl-4(1 <i>H</i> )-quinolone                                      | <i>E.compacta</i> , <i>E.daniellii</i> , <i>E.fargesii</i> ,<br><i>E.fraxinifolia</i> , <i>E.glabrifolia</i> , <i>E.rutaecarpa</i>                                                                  | 356.11969        | 24.4999<br>0 | C <sub>24</sub> H <sub>37</sub> NO              | [M+H] <sup>+</sup> |
| Alkaloids | Quinolone alkaloids | 1-methyl-2-[13-hydroxytridecenyl]-4(1 <i>H</i> )-quinolone                          | <i>E.daniellii</i> , <i>E.fargesii</i> , <i>E.glabrifolia</i> ,<br><i>E.rutaecarpa</i>                                                                                                              | 358.24548        | 29.4985<br>6 | C <sub>23</sub> H <sub>35</sub> NO <sub>2</sub> | [M+H] <sup>+</sup> |
| Alkaloids | Quinolone alkaloids | 1-methyl-2-[( <i>Z</i> )-6-pentadecenyl]-4(1 <i>H</i> )-quinolone                   | <i>E.daniellii</i> , <i>E.glabrifolia</i> , <i>E.rutaecarpa</i>                                                                                                                                     | 366.22809        | 49.7632<br>0 | C <sub>25</sub> H <sub>37</sub> NO              | [M+H] <sup>+</sup> |
| Alkaloids | Quinolone alkaloids | 1-methyl-2-[(6 <i>Z</i> ,9 <i>Z</i> )-6,9-pentadecadienyl]-4(1 <i>H</i> )-quinolone | <i>E.compacta</i> , <i>E.fargesii</i> , <i>E.fraxinifolia</i> ,<br><i>E.glabrifolia</i> , <i>E.rutaecarpa</i> ,<br><i>E.sutchuenensis</i>                                                           | 366.27820        | 53.8651<br>0 | C <sub>25</sub> H <sub>35</sub> NO              | [M+H] <sup>+</sup> |
| Alkaloids | Quinolone alkaloids | 2-nonyl-4(1 <i>H</i> )-quinolone                                                    | <i>E.fraxinifolia</i> , <i>E.glabrifolia</i> , <i>E.lepta</i> ,<br><i>E.rutaecarpa</i>                                                                                                              | 272.20270        | 55.3438<br>8 | C <sub>18</sub> H <sub>25</sub> NO              | [M+H] <sup>+</sup> |
| Alkaloids | Quinolone alkaloids | (-) edulinine                                                                       | <i>E.glabrifolia</i>                                                                                                                                                                                | 292.18768        | 47.4153<br>9 | C <sub>16</sub> H <sub>21</sub> NO <sub>4</sub> | [M+H] <sup>+</sup> |
| Alkaloids | Quinolone alkaloids | 2-tridecyl-4(1 <i>H</i> )-quinolone                                                 | <i>E.compacta</i> , <i>E.delavayi</i> , <i>E.fargesii</i> ,<br><i>E.fraxinifolia</i>                                                                                                                | 318.17288        | 68.9512<br>5 | C <sub>22</sub> H <sub>23</sub> NO              | [M+H] <sup>+</sup> |
| Alkaloids | Quinolone alkaloids | 1-methyl-2-[(4 <i>Z</i> ,7 <i>Z</i> )-4,7-tridecadienyl]-4(1 <i>H</i> )-quinolone   | <i>E.compacta</i> , <i>E.fargesii</i> , <i>E.fraxinifolia</i> ,<br><i>E.glabrifolia</i>                                                                                                             | 338.25650        | 58.3908<br>6 | C <sub>23</sub> H <sub>31</sub> NO              | [M+H] <sup>+</sup> |
| Alkaloids | Quinolone alkaloids | 1-methyl-2-[( <i>Z</i> )-10-pentadecenyl]-4(1 <i>H</i> )-                           | <i>E.fargesii</i>                                                                                                                                                                                   | 338.34430        | 76.4060<br>9 | C <sub>25</sub> H <sub>37</sub> NO              | [M+H] <sup>+</sup> |

| Class I   | Class II            | Compounds                                                                               | Species                                                                                 | Molecular Weight | Rt (min)     | Formula                                         | Ionization model   |
|-----------|---------------------|-----------------------------------------------------------------------------------------|-----------------------------------------------------------------------------------------|------------------|--------------|-------------------------------------------------|--------------------|
| Alkaloids | Quinolone alkaloids | quinolone<br>1-methyl-2-[7-carbonyl-( <i>E</i> )-9-tridecenyl]-4(1 <i>H</i> )-quinolone | <i>E.compacta</i> , <i>E.fargesii</i> , <i>E.glabrifolia</i> ,<br><i>E.rutaecarpa</i>   | 354.22998        | 46.8401<br>3 | C <sub>23</sub> H <sub>31</sub> NO <sub>2</sub> | [M+H] <sup>+</sup> |
| Alkaloids | Quinolone alkaloids | euocarpine D                                                                            | <i>E.fargesii</i>                                                                       | 354.22998        | 59.6542<br>2 | C <sub>23</sub> H <sub>31</sub> NO <sub>2</sub> | [M+H] <sup>+</sup> |
| Alkaloids | Quinolone alkaloids | 1-methyl-2-pentadecenyl-4(1 <i>H</i> )-quinolone                                        | <i>E.compacta</i> , <i>E.fargesii</i> , <i>E.fraxinifolia</i> ,<br><i>E.glabrifolia</i> | 370.27798        | 70.1014<br>3 | C <sub>25</sub> H <sub>39</sub> NO              | [M+H] <sup>+</sup> |
| Alkaloids | Quinolone alkaloids | 1-methyl-2-[15-hydroxyl-pentadecenyl]-4(1 <i>H</i> )-quinolone                          | <i>E.compacta</i> , <i>E.fargesii</i>                                                   | 386.28729        | 66.6798<br>5 | C <sub>25</sub> H <sub>39</sub> NO <sub>2</sub> | [M+H] <sup>+</sup> |
| Alkaloids | Quinolone alkaloids | 1-methyl-2-octyl-4(1 <i>H</i> )-quinolone                                               | <i>E.ailanthifolia</i> , <i>E.compacta</i> , <i>E.glabrifolia</i>                       | 272.20270        | 55.2916<br>5 | C <sub>18</sub> H <sub>25</sub> NO              | [M+H] <sup>+</sup> |
| Alkaloids | Acridone alkaloids  | xanthoxoline                                                                            | <i>E.ailanthifolia</i> , <i>E.rutaecarpa</i>                                            | 272.06088        | 19.9766<br>6 | C <sub>15</sub> H <sub>13</sub> NO <sub>4</sub> | [M+H] <sup>+</sup> |
| Alkaloids | Acridone alkaloids  | evoxanthine                                                                             | <i>E.sutchuenensis</i>                                                                  | 284.10715        | 4.27653      | C <sub>16</sub> H <sub>13</sub> NO <sub>4</sub> | [M+H] <sup>+</sup> |
| Alkaloids | Acridone alkaloids  | 4-hydroxy-2,3-dimethoxy-10-methylacridone                                               | <i>E.ailanthifolia</i>                                                                  | 302.13019        | 21.8966<br>2 | C <sub>16</sub> H <sub>15</sub> NO <sub>5</sub> | [M+H] <sup>+</sup> |
| Alkaloids | Acridone alkaloids  | melicopidine                                                                            | <i>E.delavayi</i> , <i>E.fargesii</i> , <i>E.glabrifolia</i>                            | 314.08099        | 0.76270      | C <sub>17</sub> H <sub>15</sub> NO <sub>5</sub> | [M+H] <sup>+</sup> |
| Alkaloids | Acridone alkaloids  | skimmianine                                                                             | <i>E.compacta</i> , <i>E.fargesii</i> , <i>E.fraxinifolia</i> ,<br><i>E.glabrifolia</i> | 260.09630        | 9.43573      | C <sub>14</sub> H <sub>13</sub> NO <sub>4</sub> | [M+H] <sup>+</sup> |
| Alkaloids | Acridone            | kokusaginine                                                                            | <i>E.sutchuenensis</i>                                                                  | 260.09839        | 10.8335      | C <sub>14</sub> H <sub>13</sub> NO <sub>4</sub> | [M+H] <sup>+</sup> |

| Class I   | Class II            | Compounds                                         | Species                                                                                       | Molecular Weight | Rt (min) | Formula                                          | Ionization model   |
|-----------|---------------------|---------------------------------------------------|-----------------------------------------------------------------------------------------------|------------------|----------|--------------------------------------------------|--------------------|
|           | alkaloids           |                                                   |                                                                                               |                  | 8        |                                                  |                    |
| Alkaloids | Acridone alkaloids  | isobalfourodine                                   | <i>E.compacta</i>                                                                             | 290.13449        | 91.6419  | C <sub>16</sub> H <sub>19</sub> NO <sub>4</sub>  | [M+H] <sup>+</sup> |
|           | alkaloids           |                                                   |                                                                                               |                  | 9        |                                                  |                    |
| Alkaloids | Acridone alkaloids  | 2,3,4-trimethoxy-10-methylacridone                | <i>E.daniellii</i>                                                                            | 300.12140        | 39.4928  | C <sub>17</sub> H <sub>17</sub> NO <sub>4</sub>  | [M+H] <sup>+</sup> |
|           | alkaloids           |                                                   |                                                                                               |                  | 9        |                                                  |                    |
| Alkaloids | Berberine alkaloids | coptisine                                         | <i>E.austrosinensis, E.compacta, E.fargesii, E.glabrifolia, E.rutaecarpa, E.sutchuenensis</i> | 321.10950        | 3.38678  | C <sub>19</sub> H <sub>14</sub> NO <sub>4</sub>  | [M+H] <sup>+</sup> |
|           | alkaloids           |                                                   |                                                                                               |                  |          |                                                  |                    |
| Alkaloids | Berberine alkaloids | epiberberine                                      | <i>E.ailanthifolia, E.compacta, E.daniellii, E.delavayi, E.lepta</i>                          | 337.09830        | 1.47941  | C <sub>20</sub> H <sub>18</sub> NO <sub>4</sub>  | [M+H] <sup>+</sup> |
|           | alkaloids           |                                                   |                                                                                               |                  |          |                                                  |                    |
| Alkaloids | Berberine alkaloids | berberine                                         | <i>E.ailanthifolia, E.compacta, E.fargesii, E.rutaecarpa</i>                                  | 337.08078        | 1.33046  | C <sub>20</sub> H <sub>18</sub> NO <sub>4</sub>  | [M+H] <sup>+</sup> |
|           | alkaloids           |                                                   |                                                                                               |                  |          |                                                  |                    |
| Alkaloids | Berberine alkaloids | berberastine                                      | <i>E.ailanthifolia, E.austrosinensis, E.compacta, E.delavayi, E.lepta, E.sutchuenensis</i>    | 353.13449        | 30.7228  | C <sub>20</sub> H <sub>18</sub> NO <sub>5</sub>  | [M+H] <sup>+</sup> |
|           | alkaloids           |                                                   |                                                                                               |                  | 2        |                                                  |                    |
|           |                     |                                                   |                                                                                               |                  |          |                                                  |                    |
| Alkaloids | Berberine alkaloids | jatrorrhizine                                     | <i>E.ailanthifolia, E.daniellii, E.rutaecarpa</i>                                             | 339.12650        | 21.7421  | C <sub>20</sub> H <sub>20</sub> NO <sub>4</sub>  | [M+H] <sup>+</sup> |
|           | alkaloids           |                                                   |                                                                                               |                  | 8        |                                                  |                    |
| Alkaloids | Carboline alkaloids | 2-methyl-6-hydroxy-1,2,3,4-tetrahydro-β-carboline | <i>E.daniellii, E.fargesii</i>                                                                | 203.10730        | 22.6888  | C <sub>12</sub> H <sub>14</sub> N <sub>2</sub> O | [M+H] <sup>+</sup> |
|           | alkaloids           |                                                   |                                                                                               |                  | 2        |                                                  |                    |
|           |                     |                                                   |                                                                                               |                  |          |                                                  |                    |
| Alkaloids | Carboline alkaloids | 6-methoxy-N-methyl-1,2,3,4-tetrahydro-β-carboline | <i>E.ailanthifolia, E.daniellii, E.glabrifolia</i>                                            | 217.17690        | 47.7275  | C <sub>13</sub> H <sub>16</sub> N <sub>2</sub> O | [M+H] <sup>+</sup> |
|           | alkaloids           |                                                   |                                                                                               |                  | 7        |                                                  |                    |

| Class I   | Class II                 | Compounds           | Species                                                                                                                          | Molecular Weight | Rt (min) | Formula                                         | Ionization model   |
|-----------|--------------------------|---------------------|----------------------------------------------------------------------------------------------------------------------------------|------------------|----------|-------------------------------------------------|--------------------|
| Alkaloids | Furanquinoline alkaloids | 6-methoxydictamnine | <i>E.austrosinensis</i> , <i>E.lepta</i> , <i>E.rutaecarpa</i> , <i>E.sutchuenensis</i>                                          | 230.09249        | 3.62308  | C <sub>13</sub> H <sub>11</sub> NO <sub>3</sub> | [M+H] <sup>+</sup> |
| Alkaloids | Furanquinoline alkaloids | evolitrine          | <i>E.rutaecarpa</i>                                                                                                              | 230.14539        | 19.63435 | C <sub>13</sub> H <sub>11</sub> NO <sub>3</sub> | [M+H] <sup>+</sup> |
| Alkaloids | Furanquinoline alkaloids | leptanoine A        | <i>E.fargesii</i> , <i>E.rutaecarpa</i>                                                                                          | 282.11649        | 0.95531  | C <sub>17</sub> H <sub>15</sub> NO <sub>3</sub> | [M+H] <sup>+</sup> |
| Alkaloids | Furanquinoline alkaloids | melineurine         | <i>E.compacta</i> , <i>E.fraxinifolia</i> , <i>E.glabrifolia</i> , <i>E.lepta</i> , <i>E.rutaecarpa</i> , <i>E.sutchuenensis</i> | 284.11520        | 0.88546  | C <sub>17</sub> H <sub>17</sub> NO <sub>3</sub> | [M+H] <sup>+</sup> |
| Alkaloids | Furanquinoline alkaloids | roxiamine C         | <i>E.ailanthifolia</i> , <i>E.delavayi</i> , <i>E.rutaecarpa</i>                                                                 | 288.10788        | 24.06148 | C <sub>16</sub> H <sub>17</sub> NO <sub>4</sub> | [M+H] <sup>+</sup> |
| Alkaloids | Furanquinoline alkaloids | buchapine           | <i>E.rutaecarpa</i>                                                                                                              | 298.11011        | 1.10965  | C <sub>19</sub> H <sub>23</sub> NO <sub>2</sub> | [M+H] <sup>+</sup> |
| Alkaloids | Furanquinoline alkaloids | leptanoine B        | <i>E.glabrifolia</i> , <i>E.rutaecarpa</i> , <i>E.sutchuenensis</i>                                                              | 312.12088        | 19.88019 | C <sub>18</sub> H <sub>17</sub> NO <sub>4</sub> | [M+H] <sup>+</sup> |
| Alkaloids | Furanquinoline alkaloids | leptanoine C        | <i>E.compacta</i> , <i>E.fraxinifolia</i> , <i>E.rutaecarpa</i> , <i>E.sutchuenensis</i>                                         | 314.14868        | 0.76055  | C <sub>18</sub> H <sub>19</sub> NO <sub>4</sub> | [M+H] <sup>+</sup> |
| Alkaloids | Furanquinoline alkaloids | anhydroevoxine      | <i>E.compacta</i> , <i>E.daniellii</i> , <i>E.fargesii</i> , <i>E.rutaecarpa</i> , <i>E.sutchuenensis</i>                        | 330.12158        | 21.19140 | C <sub>18</sub> H <sub>19</sub> NO <sub>5</sub> | [M+H] <sup>+</sup> |
| Alkaloids | Furanquinoline alkaloids | roxiamine B         | <i>E.austrosinensis</i> , <i>E.compacta</i> , <i>E.delavayi</i>                                                                  | 328.12918        | 1.25079  | C <sub>18</sub> H <sub>17</sub> NO <sub>5</sub> | [M+H] <sup>+</sup> |
| Alkaloids | Furanquinoline alkaloids | evolatine           | <i>E.fargesii</i>                                                                                                                | 348.14268        | 1.54506  | C <sub>18</sub> H <sub>21</sub> NO <sub>6</sub> | [M+H] <sup>+</sup> |
| Alkaloids | Furanquinoline alkaloids | evoxine             | <i>E.lepta</i>                                                                                                                   | 348.14270        | 2.38072  | C <sub>18</sub> H <sub>21</sub> NO <sub>6</sub> | [M+H] <sup>+</sup> |

| Class I   | Class II                 | Compounds                               | Species                                                                                                                                                                                              | Molecular Weight | Rt (min)     | Formula                                                       | Ionization model   |
|-----------|--------------------------|-----------------------------------------|------------------------------------------------------------------------------------------------------------------------------------------------------------------------------------------------------|------------------|--------------|---------------------------------------------------------------|--------------------|
| Alkaloids | Pyranquinoline alkaloids | flindersine                             | <i>E.ailanthifolia</i> , <i>E.austrosinensis</i> ,<br><i>E.daniellii</i> , <i>E.glabrifolia</i> , <i>E.rutaecarpa</i> ,<br><i>E.sutchuenensis</i>                                                    | 228.09779        | 7.65223      | C <sub>14</sub> H <sub>13</sub> NO <sub>2</sub>               | [M+H] <sup>+</sup> |
| Alkaloids | Pyranquinoline alkaloids | haplamine                               | <i>E.austrosinensis</i> , <i>E.compacta</i> , <i>E.daniellii</i> ,<br><i>E.fargesii</i> , <i>E.glabrifolia</i> , <i>E.lepta</i> ,<br><i>E.rutaecarpa</i> , <i>E.sutchuenensis</i>                    | 258.10590        | 14.8617<br>8 | C <sub>15</sub> H <sub>15</sub> NO <sub>3</sub>               | [M+H] <sup>+</sup> |
| Alkaloids | Pyranquinoline alkaloids | (-) ribalinine                          | <i>E.austrosinensis</i> , <i>E.glabrifolia</i> , <i>E.lepta</i> ,<br><i>E.rutaecarpa</i> , <i>E.sutchuenensis</i>                                                                                    | 260.11380        | 1.04642      | C <sub>15</sub> H <sub>17</sub> NO <sub>3</sub>               | [M+H] <sup>+</sup> |
| Alkaloids | Pyranquinoline alkaloids | (+)-ribahnine                           | <i>E.lepta</i> , <i>E.sutchuenensis</i>                                                                                                                                                              | 260.11380        | 0.66055      | C <sub>15</sub> H <sub>17</sub> NO <sub>4</sub>               | [M+H] <sup>+</sup> |
| Alkaloids | Quinazoline alkaloids    | vasicinone                              | <i>E.glabrifolia</i> , <i>E.rutaecarpa</i> ,<br><i>E.sutchuenensis</i>                                                                                                                               | 203.05280        | 0.87924      | C <sub>11</sub> H <sub>10</sub> N <sub>2</sub> O <sub>2</sub> | [M+H] <sup>+</sup> |
| Alkaloids | Quinazoline alkaloids    | fumiquinazolines J                      | <i>E.austrosinensis</i> , <i>E.compacta</i> , <i>E.daniellii</i> ,<br><i>E.delavayi</i> , <i>E.fargesii</i> , <i>E.glabrifolia</i> ,<br><i>E.lepta</i> , <i>E.rutaecarpa</i>                         | 357.14771        | 14.1150<br>0 | C <sub>21</sub> H <sub>16</sub> N <sub>4</sub> O <sub>2</sub> | [M+H] <sup>+</sup> |
| Alkaloids | Quinazoline alkaloids    | fumiquinazolines A                      | <i>E.sutchuenensis</i>                                                                                                                                                                               | 446.17709        | 1.15185      | C <sub>24</sub> H <sub>23</sub> N <sub>5</sub> O <sub>4</sub> | [M+H] <sup>+</sup> |
| Alkaloids | Quinazoline alkaloids    | fumiquinazolines E                      | <i>E.ailanthifolia</i> , <i>E.compacta</i> ,<br><i>E.sutchuenensis</i>                                                                                                                               | 476.19650        | 5.21834      | C <sub>25</sub> H <sub>25</sub> N <sub>5</sub> O <sub>5</sub> | [M+H] <sup>+</sup> |
| Alkaloids | Tryptamine alkaloids     | fargesine                               | <i>E.austrosinensis</i> , <i>E.compacta</i> , <i>E.daniellii</i> ,<br><i>E.delavayi</i> , <i>E.fargesii</i> , <i>E.fraxinifolia</i> ,<br><i>E.glabrifolia</i> , <i>E.lepta</i> , <i>E.rutaecarpa</i> | 219.10210        | 6.45477      | C <sub>12</sub> H <sub>14</sub> N <sub>2</sub> O <sub>2</sub> | [M+H] <sup>+</sup> |
| Alkaloids | Tryptamine alkaloids     | <i>N,N</i> -dimethy-5-methoxytryptamine | <i>E.ailanthifolia</i> , <i>E.daniellii</i> , <i>E.rutaecarpa</i>                                                                                                                                    | 219.14450        | 1.60360      | C <sub>13</sub> H <sub>18</sub> N <sub>2</sub> O              | [M+H] <sup>+</sup> |

| Class I   | Class II             | Compounds                                                                         | Species                                                                                                                                                      | Molecular Weight | Rt (min)     | Formula                                                       | Ionization model   |
|-----------|----------------------|-----------------------------------------------------------------------------------|--------------------------------------------------------------------------------------------------------------------------------------------------------------|------------------|--------------|---------------------------------------------------------------|--------------------|
| Alkaloids | Tryptamine alkaloids | 5-methoxy- <i>N,N</i> -dimethyltryptamine- <i>N</i> $\beta$ -oxide                | <i>E.ailanthifolia</i> , <i>E.austrosinensis</i> ,<br><i>E.compacta</i> , <i>E.fargesii</i> , <i>E.glabrifolia</i> ,<br><i>E.lepta</i> , <i>E.rutaecarpa</i> | 235.08780        | 19.9766<br>6 | C <sub>13</sub> H <sub>18</sub> N <sub>2</sub> O <sub>2</sub> | [M+H] <sup>+</sup> |
| Alkaloids | Tryptamine alkaloids | 5-methoxy- <i>N,N</i> -dimethyltryptamine                                         | <i>E.daniellii</i>                                                                                                                                           | 219.10210        | 8.07471      | C <sub>13</sub> H <sub>18</sub> N <sub>2</sub> O              | [M+H] <sup>+</sup> |
| Alkaloids | Tryptamine alkaloids | bufotenine 5- <i>O</i> - $\beta$ -D-glucopyranoside <i>N</i> 12-oxide             | <i>E.compacta</i> , <i>E.fraxinifolia</i> , <i>E.glabrifolia</i>                                                                                             | 384.18799        | 65.9426<br>3 | C <sub>18</sub> H <sub>27</sub> N <sub>2</sub> O <sub>7</sub> | [M+H] <sup>+</sup> |
| Alkaloids | Tryptamine alkaloids | bufotenine <i>N</i> 12-oxide                                                      | <i>E.compacta</i> , <i>E.lepta</i>                                                                                                                           | 222.10359        | 1.06986      | C <sub>12</sub> H <sub>17</sub> N <sub>2</sub> O <sub>2</sub> | [M+H] <sup>+</sup> |
| Alkaloids | Tryptamine alkaloids | plectocomine 12-methyl-5- <i>O</i> - $\beta$ -D-glucopyranoside <i>N</i> 12-oxide | <i>E.austrosinensis</i> , <i>E.lepta</i> , <i>E.rutaecarpa</i>                                                                                               | 383.17139        | 5.09379      | C <sub>18</sub> H <sub>25</sub> N <sub>2</sub> O <sub>7</sub> | [M+H] <sup>+</sup> |
| Alkaloids | Tryptamine alkaloids | bufotenine                                                                        | <i>E.austrosinensis</i>                                                                                                                                      | 205.08549        | 57.1538<br>7 | C <sub>12</sub> H <sub>16</sub> N <sub>2</sub> O              | [M+H] <sup>+</sup> |
| Alkaloids | Others               | harmine                                                                           | <i>E.glabrifolia</i> , <i>E.rutaecarpa</i>                                                                                                                   | 213.17769        | 0.47736      | C <sub>13</sub> H <sub>12</sub> N <sub>2</sub> O              | [M+H] <sup>+</sup> |
| Alkaloids | Others               | canthin-6-one                                                                     | <i>E.ailanthifolia</i> , <i>E.austrosinensis</i> ,<br><i>E.daniellii</i> , <i>E.rutaecarpa</i>                                                               | 221.12810        | 1.13202      | C <sub>14</sub> H <sub>8</sub> N <sub>2</sub> O               | [M+H] <sup>+</sup> |
| Alkaloids | Others               | higenamine                                                                        | <i>E.ailanthifolia</i> , <i>E.austrosinensis</i> ,<br><i>E.compacta</i> , <i>E.daniellii</i> , <i>E.rutaecarpa</i> ,<br><i>E.sutchuenensis</i>               | 272.12390        | 1.30209      | C <sub>16</sub> H <sub>17</sub> NO <sub>3</sub>               | [M+H] <sup>+</sup> |
| Alkaloids | Others               | ethylleptol B                                                                     | <i>E.ailanthifolia</i> , <i>E.compacta</i> , <i>E.daniellii</i> ,<br><i>E.delavayi</i> , <i>E.fargesii</i> , <i>E.glabrifolia</i> ,<br><i>E.rutaecarpa</i>   | 293.20309        | 24.7038<br>1 | C <sub>17</sub> H <sub>24</sub> O <sub>4</sub>                | [M+H] <sup>+</sup> |
| Alkaloids | Others               | shewanellines C                                                                   | <i>E.compacta</i> , <i>E.rutaecarpa</i>                                                                                                                      | 296.12663        | 1.04826      | C <sub>16</sub> H <sub>13</sub> N <sub>3</sub> O <sub>3</sub> | [M+H] <sup>+</sup> |

| Class I        | Class II   | Compounds      | Species                                                                                                                                                                                                   | Molecular Weight | Rt (min) | Formula                                         | Ionization model   |
|----------------|------------|----------------|-----------------------------------------------------------------------------------------------------------------------------------------------------------------------------------------------------------|------------------|----------|-------------------------------------------------|--------------------|
| Alkaloids      | Others     | evellerine     | <i>E.compacta</i> , <i>E.lepta</i>                                                                                                                                                                        | 318.12198        | 3.86699  | C <sub>17</sub> H <sub>19</sub> NO <sub>5</sub> | [M+H] <sup>+</sup> |
| Alkaloids      | Others     | halfordinine   | <i>E.ailanthifolia</i>                                                                                                                                                                                    | 290.09958        | 24.4471  | C <sub>15</sub> H <sub>15</sub> NO <sub>5</sub> | [M+H] <sup>+</sup> |
|                |            |                |                                                                                                                                                                                                           |                  | 2        |                                                 |                    |
| Phenolic acids | Coumarins  | xanthotoxin    | <i>E.ailanthifolia</i> , <i>E.austrosinensis</i> ,<br><i>E.delavayi</i> , <i>E.glabrifolia</i> , <i>E.lepta</i> ,<br><i>E.rutaecarpa</i>                                                                  | 217.08549        | 1.19454  | C <sub>12</sub> H <sub>8</sub> O <sub>4</sub>   | [M+H] <sup>+</sup> |
| Phenolic acids | Coumarins  | isopimpinellin | <i>E.compacta</i> , <i>E.daniellii</i> , <i>E.delavayi</i> ,<br><i>E.fargesii</i> , <i>E.glabrifolia</i> , <i>E.rutaecarpa</i>                                                                            | 247.09720        | 2.19990  | C <sub>13</sub> H <sub>10</sub> O <sub>5</sub>  | [M+H] <sup>+</sup> |
| Phenolic acids | Coumarins  | bergapten      | <i>E.austrosinensis</i> , <i>E.delavayi</i>                                                                                                                                                               | 217.04329        | 1.72412  | C <sub>12</sub> H <sub>8</sub> O <sub>4</sub>   | [M+H] <sup>+</sup> |
| Phenolic acids | Flavonoids | phellamurin    | <i>E.austrosinensis</i> , <i>E.fargesii</i> , <i>E.glabrifolia</i>                                                                                                                                        | 519.35168        | 74.7508  | C <sub>26</sub> H <sub>30</sub> O <sub>11</sub> | [M+H] <sup>+</sup> |
|                |            |                |                                                                                                                                                                                                           |                  | 9        |                                                 |                    |
| Phenolic acids | Flavonoids | hesperidin     | <i>E.compacta</i> , <i>E.glabrifolia</i>                                                                                                                                                                  | 611.15851        | 13.7558  | C <sub>28</sub> H <sub>34</sub> O <sub>15</sub> | [M+H] <sup>+</sup> |
|                |            |                |                                                                                                                                                                                                           |                  | 3        |                                                 |                    |
| Phenolic acids | Flavonoids | flavaprin      | <i>E.compacta</i>                                                                                                                                                                                         | 503.20078        | 13.7168  | C <sub>26</sub> H <sub>30</sub> O <sub>10</sub> | [M+H] <sup>+</sup> |
|                |            |                |                                                                                                                                                                                                           |                  | 8        |                                                 |                    |
| Phenolic acids | others     | leptene B      | <i>E.ailanthifolia</i> , <i>E.austrosinensis</i> ,<br><i>E.compacta</i> , <i>E.daniellii</i> , <i>E.delavayi</i> ,<br><i>E.fargesii</i> , <i>E.fraxinifolia</i> , <i>E.lepta</i> ,<br><i>E.rutaecarpa</i> | 247.11229        | 6.93464  | C <sub>15</sub> H <sub>18</sub> O <sub>3</sub>  | [M+H] <sup>+</sup> |
|                |            |                |                                                                                                                                                                                                           |                  |          |                                                 |                    |
| Phenolic acids | others     | isoevodionol   | <i>E.ailanthifolia</i> , <i>E.austrosinensis</i> ,<br><i>E.compacta</i> , <i>E.fargesii</i> , <i>E.fraxinifolia</i> ,<br><i>E.glabrifolia</i> , <i>E.lepta</i> , <i>E.rutaecarpa</i>                      | 249.11279        | 0.95264  | C <sub>14</sub> H <sub>16</sub> O <sub>4</sub>  | [M+H] <sup>+</sup> |

| Class I        | Class II | Compounds              | Species                                                                                                                                                                                                                    | Molecular Weight | Rt (min) | Formula                                        | Ionization model   |
|----------------|----------|------------------------|----------------------------------------------------------------------------------------------------------------------------------------------------------------------------------------------------------------------------|------------------|----------|------------------------------------------------|--------------------|
| Phenolic acids | others   | leptol B               | <i>E.ailanthifolia</i> , <i>E.compacta</i> , <i>E.daniellii</i> , <i>E.delavayi</i> , <i>E.fargesii</i> , <i>E.glabrifolia</i> , <i>E.rutaecarpa</i>                                                                       | 265.11230        | 1.80185  | C <sub>15</sub> H <sub>20</sub> O <sub>4</sub> | [M+H] <sup>+</sup> |
| Phenolic acids | others   | emodin                 | <i>E.austrosinensis</i> , <i>E.rutaecarpa</i>                                                                                                                                                                              | 271.07735        | 22.80786 | C <sub>15</sub> H <sub>10</sub> O <sub>5</sub> | [M+H] <sup>+</sup> |
| Phenolic acids | others   | leptene A              | <i>E.ailanthifolia</i> , <i>E.daniellii</i> , <i>E.fraxinifolia</i> , <i>E.lepta</i> , <i>E.rutaecarpa</i> , <i>E.sutchuenensis</i>                                                                                        | 277.15640        | 22.08363 | C <sub>16</sub> H <sub>20</sub> O <sub>4</sub> | [M+H] <sup>+</sup> |
| Phenolic acids | others   | methylleptol B         | <i>E.ailanthifolia</i> , <i>E.austrosinensis</i> , <i>E.compacta</i> , <i>E.daniellii</i> , <i>E.delavayi</i> , <i>E.fargesii</i> , <i>E.fraxinifolia</i> , <i>E.glabrifolia</i> , <i>E.lepta</i> , <i>E.sutchuenensis</i> | 279.15100        | 27.55854 | C <sub>16</sub> H <sub>22</sub> O <sub>4</sub> | [M+H] <sup>+</sup> |
| Phenolic acids | others   | leptin A               | <i>E.ailanthifolia</i> , <i>E.compacta</i> , <i>E.daniellii</i> , <i>E.fargesii</i> , <i>E.lepta</i> , <i>E.rutaecarpa</i> , <i>E.sutchuenensis</i>                                                                        | 283.10199        | 6.07034  | C <sub>14</sub> H <sub>18</sub> O <sub>6</sub> | [M+H] <sup>+</sup> |
| Phenolic acids | others   | leptin B               | <i>E.compacta</i> , <i>E.rutaecarpa</i>                                                                                                                                                                                    | 283.10199        | 4.18155  | C <sub>14</sub> H <sub>18</sub> O <sub>6</sub> | [M+H] <sup>+</sup> |
| Phenolic acids | others   | physcion               | <i>E.ailanthifolia</i> , <i>E.austrosinensis</i> , <i>E.compacta</i> , <i>E.daniellii</i> , <i>E.fraxinifolia</i>                                                                                                          | 285.09790        | 37.56786 | C <sub>16</sub> H <sub>12</sub> O <sub>5</sub> | [M+H] <sup>+</sup> |
| Phenolic acids | others   | alloeodione            | <i>E.rutaecarpa</i>                                                                                                                                                                                                        | 293.20309        | 27.58928 | C <sub>16</sub> H <sub>20</sub> O <sub>5</sub> | [M+H] <sup>+</sup> |
| Phenolic acids | others   | leptol A               | <i>E.glabrifolia</i>                                                                                                                                                                                                       | 295.11688        | 1.12054  | C <sub>16</sub> H <sub>22</sub> O <sub>5</sub> | [M+H] <sup>+</sup> |
| Phenolic       | others   | 2-(1'-geranyloxy)-4,6- | <i>E.compacta</i> , <i>E.daniellii</i> , <i>E.lepta</i>                                                                                                                                                                    | 305.10941        | 23.1827  | C <sub>18</sub> H <sub>24</sub> O <sub>4</sub> | [M+H] <sup>+</sup> |

| Class I        | Class II | Compounds                              | Species                                                                                                                                                                                                                                                   | Molecular Weight | Rt (min) | Formula                                                       | Ionization model   |
|----------------|----------|----------------------------------------|-----------------------------------------------------------------------------------------------------------------------------------------------------------------------------------------------------------------------------------------------------------|------------------|----------|---------------------------------------------------------------|--------------------|
| acids          |          | dihydroxyacetophenone                  |                                                                                                                                                                                                                                                           |                  | 0        |                                                               |                    |
| Phenolic acids | others   | leptin C                               | <i>E.ailanthifolia</i> , <i>E.austrosinensis</i> ,<br><i>E.compacta</i> , <i>E.daniellii</i> , <i>E.delavayi</i> ,<br><i>E.fargesii</i> , <i>E.fraxinifolia</i> , <i>E.glabrifolia</i> ,<br><i>E.lepta</i> , <i>E.rutaecarpa</i> , <i>E.sutchuenensis</i> | 311.14319        | 5.67042  | C <sub>16</sub> H <sub>22</sub> O <sub>6</sub>                | [M+H] <sup>+</sup> |
| Phenolic acids | others   | leucomidines C                         | <i>E.austrosinensis</i> , <i>E.compacta</i> , <i>E.daniellii</i> ,<br><i>E.fargesii</i> , <i>E.fraxinifolia</i> , <i>E.glabrifolia</i> ,<br><i>E.rutaecarpa</i>                                                                                           | 315.19901        | 38.58466 | C <sub>18</sub> H <sub>22</sub> N <sub>2</sub> O <sub>3</sub> | [M+H] <sup>+</sup> |
| Phenolic acids | others   | melofolione   a                        | <i>E.austrosinensis</i> , <i>E.compacta</i> ,<br><i>E.glabrifolia</i> , <i>E.rutaecarpa</i>                                                                                                                                                               | 319.11050        | 1.26927  | C <sub>18</sub> H <sub>22</sub> O <sub>5</sub>                | [M+H] <sup>+</sup> |
| Phenolic acids | others   | leucomidines A                         | <i>E.ailanthifolia</i> , <i>E.fargesii</i> , <i>E.lepta</i> ,<br><i>E.rutaecarpa</i> , <i>E.sutchuenensis</i>                                                                                                                                             | 325.13454        | 5.99697  | C <sub>19</sub> H <sub>20</sub> N <sub>2</sub> O <sub>3</sub> | [M+H] <sup>+</sup> |
| Phenolic acids | others   | leucomidines B                         | <i>E.compacta</i> , <i>E.fargesii</i> , <i>E.glabrifolia</i> ,<br><i>E.lepta</i> , <i>E.rutaecarpa</i>                                                                                                                                                    | 341.16058        | 13.89834 | C <sub>20</sub> H <sub>24</sub> N <sub>2</sub> O <sub>3</sub> | [M+H] <sup>+</sup> |
| Phenolic acids | others   | 7,4-dihydroxy-3,5,3'-trimethoxyflavone | <i>E.compacta</i> , <i>E.fargesii</i> , <i>E.glabrifolia</i> ,<br><i>E.lepta</i> , <i>E.rutaecarpa</i>                                                                                                                                                    | 345.10529        | 26.24281 | C <sub>18</sub> H <sub>16</sub> O <sub>7</sub>                | [M+H] <sup>+</sup> |
| Phenolic acids | others   | floridolide B                          |                                                                                                                                                                                                                                                           | 353.22089        | 14.98667 | C <sub>20</sub> H <sub>32</sub> O <sub>5</sub>                | [M+H] <sup>+</sup> |
| Phenolic acids | others   | floridiolic acid                       | <i>E.austrosinensis</i> , <i>E.compacta</i> , <i>E.fargesii</i> ,<br><i>E.fraxinifolia</i> , <i>E.glabrifolia</i> , <i>E.lepta</i> ,<br><i>E.rutaecarpa</i> , <i>E.sutchuenensis</i>                                                                      | 353.22430        | 47.22457 | C <sub>21</sub> H <sub>36</sub> O <sub>4</sub>                | [M+H] <sup>+</sup> |
| Phenolic acids | others   | fumiquinazolines F                     | <i>E.ailanthifolia</i> , <i>E.daniellii</i> , <i>E.fargesii</i> ,<br><i>E.lepta</i> , <i>E.sutchuenensis</i>                                                                                                                                              | 359.15369        | 3.01148  | C <sub>21</sub> H <sub>18</sub> N <sub>4</sub> O <sub>2</sub> | [M+H] <sup>+</sup> |

| Class I        | Class II | Compounds                                                  | Species                                                                                                                                                                       | Molecular Weight | Rt (min)     | Formula                                         | Ionization model   |
|----------------|----------|------------------------------------------------------------|-------------------------------------------------------------------------------------------------------------------------------------------------------------------------------|------------------|--------------|-------------------------------------------------|--------------------|
| Phenolic acids | others   | floribundic acid                                           | <i>E.compacta</i> , <i>E.delavayi</i> , <i>E.glabrifolia</i> , <i>E.rutaecarpa</i>                                                                                            | 359.17178        | 4.64139      | C <sub>21</sub> H <sub>26</sub> O <sub>5</sub>  | [M+H] <sup>+</sup> |
| Phenolic acids | others   | 3- <i>O</i> - $\beta$ -D- caffeoylquinic acid methyl ester | <i>E.compacta</i> , <i>E.daniellii</i> , <i>E.delavayi</i> , <i>E.fraxinifolia</i> , <i>E.rutaecarpa</i>                                                                      | 369.12128        | 1.20749      | C <sub>17</sub> H <sub>20</sub> O <sub>9</sub>  | [M+H] <sup>+</sup> |
| Phenolic acids | others   | meliternatin                                               | <i>E.rutaecarpa</i>                                                                                                                                                           | 371.15530        | 2.17740      | C <sub>19</sub> H <sub>14</sub> O <sub>8</sub>  | [M+H] <sup>+</sup> |
| Phenolic acids | others   | syringin                                                   | <i>E.ailanthifolia</i> , <i>E.compacta</i> , <i>E.fargesii</i> , <i>E.glabrifolia</i> , <i>E.lepta</i> , <i>E.rutaecarpa</i> , <i>E.sutchuenensis</i>                         | 373.14468        | 14.9371<br>6 | C <sub>17</sub> H <sub>24</sub> O <sub>9</sub>  | [M+H] <sup>+</sup> |
| Phenolic acids | others   | 5,4'-dihydroxy-3,7,3'-trimethoxyflavone                    | <i>E.glabrifolia</i>                                                                                                                                                          | 375.12659        | 1.71843      | C <sub>19</sub> H <sub>18</sub> O <sub>8</sub>  | [M+H] <sup>+</sup> |
| Phenolic acids | others   | isobauerenol                                               | <i>E.ailanthifolia</i> , <i>E.compacta</i> , <i>E.fargesii</i> , <i>E.glabrifolia</i> , <i>E.rutaecarpa</i>                                                                   | 385.27438        | 62.6268<br>8 | C <sub>27</sub> H <sub>44</sub> O               | [M+H] <sup>+</sup> |
| Phenolic acids | others   | citroside A                                                | <i>E.fargesii</i> , <i>E.rutaecarpa</i> , <i>E.sutchuenensis</i>                                                                                                              | 387.15704        | 5.18553      | C <sub>19</sub> H <sub>30</sub> O <sub>8</sub>  | [M+H] <sup>+</sup> |
| Phenolic acids | others   | austroside B                                               | <i>E.ailanthifolia</i> , <i>E.compacta</i> , <i>E.fargesii</i> , <i>E.fraxinifolia</i> , <i>E.glabrifolia</i> , <i>E.lepta</i> , <i>E.rutaecarpa</i> , <i>E.sutchuenensis</i> | 387.16989        | 2.20911      | C <sub>19</sub> H <sub>30</sub> O <sub>8</sub>  | [M+H] <sup>+</sup> |
| Phenolic acids | others   | corchoionoside B                                           | <i>E.ailanthifolia</i> , <i>E.compacta</i> , <i>E.fargesii</i> , <i>E.fraxinifolia</i> , <i>E.rutaecarpa</i> , <i>E.sutchuenensis</i>                                         | 401.14209        | 2.37908      | C <sub>19</sub> H <sub>28</sub> O <sub>9</sub>  | [M+H] <sup>+</sup> |
| Phenolic acids | others   | austroside A                                               | <i>E.ailanthifolia</i> , <i>E.compacta</i> , <i>E.fargesii</i> , <i>E.fraxinifolia</i> , <i>E.glabrifolia</i> , <i>E.rutaecarpa</i>                                           | 403.13895        | 6.27573      | C <sub>19</sub> H <sub>30</sub> O <sub>9</sub>  | [M+H] <sup>+</sup> |
| Phenolic acids | others   | isolimonexic acid                                          | <i>E.austrosinensis</i> , <i>E.rutaecarpa</i> , <i>E.sutchuenensis</i>                                                                                                        | 503.20078        | 10.2755<br>8 | C <sub>26</sub> H <sub>30</sub> O <sub>10</sub> | [M+H] <sup>+</sup> |

| Class I        | Class II | Compounds                                      | Species                                                                                                                                                        | Molecular Weight | Rt (min)     | Formula                                                       | Ionization model   |
|----------------|----------|------------------------------------------------|----------------------------------------------------------------------------------------------------------------------------------------------------------------|------------------|--------------|---------------------------------------------------------------|--------------------|
| Phenolic acids | others   | epimedoside C                                  | <i>E.ailanthifolia</i> , <i>E.compacta</i> , <i>E.daniellii</i> ,<br><i>E.delavayi</i> , <i>E.lepta</i>                                                        | 517.22107        | 31.9139<br>4 | C <sub>26</sub> H <sub>28</sub> O <sub>11</sub>               | [M+H] <sup>+</sup> |
| Phenolic acids | others   | ruteavine acetate                              | <i>E.austrosinensis</i> , <i>E.compacta</i> , <i>E.delavayi</i> ,<br><i>E.fargesii</i> , <i>E.fraxinifolia</i> , <i>E.glabrifolia</i> ,<br><i>E.rutaecarpa</i> | 529.32281        | 48.2883<br>8 | C <sub>28</sub> H <sub>32</sub> O <sub>10</sub>               | [M+H] <sup>+</sup> |
| Phenolic acids | others   | dichromene A                                   | <i>E.compacta</i> , <i>E.fargesii</i> , <i>E.fraxinifolia</i> ,<br><i>E.glabrifolia</i> , <i>E.rutaecarpa</i>                                                  | 571.18207        | 20.5870<br>0 | C <sub>32</sub> H <sub>42</sub> O <sub>9</sub>                | [M+H] <sup>+</sup> |
| Phenolic acids | others   | dichromene B                                   | <i>E.rutaecarpa</i>                                                                                                                                            | 571.43311        | 79.3159<br>6 | C <sub>32</sub> H <sub>42</sub> O <sub>9</sub>                | [M+H] <sup>+</sup> |
| Phenolic acids | others   | shewanellines A                                | <i>E.lepta</i> , <i>E.sutchuenensis</i>                                                                                                                        | 260.09839        | 0.92638      | C <sub>17</sub> H <sub>13</sub> N <sub>2</sub> O <sub>2</sub> | [M+H] <sup>+</sup> |
| Phenolic acids | others   | leptonol methylleptol                          | <i>E.austrosinensis</i> , <i>E.compacta</i> , <i>E.fargesii</i> ,<br><i>E.glabrifolia</i> , <i>E.rutaecarpa</i>                                                | 279.13120        | 27.7954<br>8 | C <sub>15</sub> H <sub>18</sub> O <sub>5</sub>                | [M+H] <sup>+</sup> |
| Phenolic acids | others   | quercetin                                      | <i>E.compacta</i> , <i>E.delavayi</i> , <i>E.fargesii</i> ,<br><i>E.glabrifolia</i>                                                                            | 303.04379        | 13.8080<br>5 | C <sub>15</sub> H <sub>10</sub> O <sub>7</sub>                | [M+H] <sup>+</sup> |
| Phenolic acids | others   | 2-(1'-geranyloxy)-4,6,β-trihydroxyacetophenone | <i>E.ailanthifolia</i> , <i>E.austrosinensis</i> ,<br><i>E.glabrifolia</i> , <i>E.rutaecarpa</i> , <i>E.sutchuenensis</i>                                      | 305.22549        | 73.3024<br>5 | C <sub>18</sub> H <sub>24</sub> O <sub>5</sub>                | [M+H] <sup>+</sup> |
| Phenolic acids | others   | ethylleptol A                                  | <i>E.glabrifolia</i>                                                                                                                                           | 323.18338        | 71.0498<br>0 | C <sub>18</sub> H <sub>26</sub> O <sub>5</sub>                | [M+H] <sup>+</sup> |
| Phenolic acids | others   | floridolide A                                  | <i>E.austrosinensis</i> , <i>E.compacta</i> , <i>E.fargesii</i> ,<br><i>E.fraxinifolia</i> , <i>E.glabrifolia</i>                                              | 337.23859        | 56.8899<br>8 | C <sub>20</sub> H <sub>32</sub> O <sub>4</sub>                | [M+H] <sup>+</sup> |
| Phenolic acids | others   | hydroxy lacton                                 | <i>E.ailanthifolia</i> , <i>E.austrosinensis</i> ,<br><i>E.compacta</i> , <i>E.fargesii</i> , <i>E.glabrifolia</i> , <i>E.lepta</i>                            | 363.16440        | 72.4542<br>3 | C <sub>20</sub> H <sub>26</sub> O <sub>6</sub>                | [M+H] <sup>+</sup> |
| Phenolic       | others   | ternatin                                       | <i>E.compacta</i> , <i>E.fargesii</i> , <i>E.rutaecarpa</i>                                                                                                    | 375.09885        | 1.39462      | C <sub>19</sub> H <sub>18</sub> O <sub>8</sub>                | [M+H] <sup>+</sup> |

| Class I        | Class II | Compounds                                                              | Species                                                                                                                                                                                                                                                   | Molecular Weight | Rt (min)     | Formula                                         | Ionization model   |
|----------------|----------|------------------------------------------------------------------------|-----------------------------------------------------------------------------------------------------------------------------------------------------------------------------------------------------------------------------------------------------------|------------------|--------------|-------------------------------------------------|--------------------|
| acids          |          |                                                                        |                                                                                                                                                                                                                                                           |                  |              |                                                 |                    |
| Phenolic acids | others   | dihydrophaseic acid 4'-O- $\beta$ -D-glucopyranoside                   | <i>E.ailanthifolia</i> , <i>E.compacta</i> , <i>E.delavayi</i> ,<br><i>E.glabrifolia</i> , <i>E.sutchuenensis</i>                                                                                                                                         | 384.18799        | 65.9426<br>3 | C <sub>21</sub> H <sub>32</sub> O <sub>10</sub> | [M+H] <sup>+</sup> |
| Phenolic acids | others   | methylleptol A                                                         | <i>E.compacta</i> , <i>E.daniellii</i> , <i>E.delavayi</i> ,<br><i>E.fargesii</i> , <i>E.glabrifolia</i> , <i>E.rutaecarpa</i>                                                                                                                            | 309.15390        | 3.57367      | C <sub>17</sub> H <sub>24</sub> O <sub>5</sub>  | [M+H] <sup>+</sup> |
| Phenolic acids | others   | 3-methylquercetin(5,4'-dihydroxy-3,7,8,3'-tetramethoxyflavone)         | <i>E.compacta</i> , <i>E.glabrifolia</i> , <i>E.sutchuenensis</i>                                                                                                                                                                                         | 317.07518        | 20.6356<br>2 | C <sub>16</sub> H <sub>12</sub> O <sub>7</sub>  | [M+H] <sup>+</sup> |
| Phenolic acids | others   | melofolione   b                                                        | <i>E.ailanthifolia</i> , <i>E.austrosinensis</i> ,<br><i>E.compacta</i> , <i>E.daniellii</i> , <i>E.delavayi</i> ,<br><i>E.fargesii</i> , <i>E.fraxinifolia</i> , <i>E.glabrifolia</i> ,<br><i>E.lepta</i> , <i>E.rutaecarpa</i> , <i>E.sutchuenensis</i> | 319.14468        | 16.0738<br>4 | C <sub>18</sub> H <sub>22</sub> O <sub>5</sub>  | [M+H] <sup>+</sup> |
| Phenolic acids | others   | 4-(1'-geranyloxy)- $\beta$ ,2,6-trihydroxyacetophenone                 | <i>E.lepta</i>                                                                                                                                                                                                                                            | 321.16071        | 28.7367<br>1 | C <sub>18</sub> H <sub>24</sub> O <sub>5</sub>  | [M+H] <sup>+</sup> |
| Phenolic acids | others   | 4-(1'-geranyloxy)- $\beta$ ,2,6-dihydroxyacetophenone                  | <i>E.compacta</i> , <i>E.lepta</i> , <i>E.rutaecarpa</i>                                                                                                                                                                                                  | 389.22079        | 55.7702<br>0 | C <sub>18</sub> H <sub>24</sub> O <sub>4</sub>  | [M+H] <sup>+</sup> |
| Phenolic acids | others   | 4-(1'-geranyloxy)-2,6, $\beta$ -trihydroxy-3-dimethylallylacetophenone | <i>E.ailanthifolia</i> , <i>E.austrosinensis</i> , <i>E.daniellii</i> ,<br><i>E.delavayi</i> , <i>E.fargesii</i> , <i>E.fraxinifolia</i> , <i>E.lepta</i> ,<br><i>E.rutaecarpa</i>                                                                        | 389.23239        | 32.3091<br>1 | C <sub>23</sub> H <sub>32</sub> O <sub>5</sub>  | [M+H] <sup>+</sup> |
| Phenolic acids | others   | chrysophanol                                                           | <i>E.ailanthifolia</i> , <i>E.compacta</i>                                                                                                                                                                                                                | 255.08670        | 35.6637<br>8 | C <sub>15</sub> H <sub>10</sub> O <sub>4</sub>  | [M+H] <sup>+</sup> |
| Phenolic acids | others   | 3,7-dimethylkaempferol                                                 | <i>E.compacta</i> , <i>E.fargesii</i>                                                                                                                                                                                                                     | 345.10529        | 1.06125      | C <sub>18</sub> H <sub>16</sub> O <sub>7</sub>  | [M+H] <sup>+</sup> |
| Phenolic       | others   | diosmetin-7-O- $\beta$ -D-                                             | <i>E.ailanthifolia</i>                                                                                                                                                                                                                                    | 463.23499        | 20.3475      | C <sub>22</sub> H <sub>22</sub> O <sub>11</sub> | [M+H] <sup>+</sup> |

| Class I   | Class II                           | Compounds                                                                 | Species                                                                                                                                                                                                                          | Molecular Weight | Rt (min)     | Formula                                                       | Ionization model   |
|-----------|------------------------------------|---------------------------------------------------------------------------|----------------------------------------------------------------------------------------------------------------------------------------------------------------------------------------------------------------------------------|------------------|--------------|---------------------------------------------------------------|--------------------|
| acids     |                                    | glucopyranoside                                                           |                                                                                                                                                                                                                                  |                  | 0            |                                                               |                    |
| Terpene   | limonins                           | limonin                                                                   | <i>E.ailanthifolia</i> , <i>E.austrosinensis</i> ,<br><i>E.compacta</i> , <i>E.daniellii</i> , <i>E.fargesii</i> ,<br><i>E.fraxinifolia</i> , <i>E.glabrifolia</i> , <i>E.rutaecarpa</i> ,<br><i>E.sutchuenensis</i>             | 471.19189        | 16.4031<br>9 | C <sub>26</sub> H <sub>30</sub> O <sub>8</sub>                | [M+H] <sup>+</sup> |
| Terpene   | limonins                           | evodol                                                                    | <i>E.austrosinensis</i> , <i>E.compacta</i> , <i>E.daniellii</i> ,<br><i>E.delavayi</i> , <i>E.fargesii</i> , <i>E.fraxinifolia</i> ,<br><i>E.glabrifolia</i> , <i>E.lepta</i> , <i>E.rutaecarpa</i> ,<br><i>E.sutchuenensis</i> | 485.32550        | 63.2982<br>9 | C <sub>26</sub> H <sub>28</sub> O <sub>9</sub>                | [M+H] <sup>+</sup> |
| Terpene   | limonins                           | rutaevine                                                                 | <i>E.austrosinensis</i> , <i>E.delavayi</i> , <i>E.fargesii</i> ,<br><i>E.fraxinifolia</i> , <i>E.glabrifolia</i> , <i>E.rutaecarpa</i> ,<br><i>E.sutchuenensis</i>                                                              | 487.36829        | 77.0922<br>1 | C <sub>26</sub> H <sub>30</sub> O <sub>9</sub>                | [M+H] <sup>+</sup> |
| Terpene   | limonins                           | shihulimonin A1                                                           | <i>E.austrosinensis</i> , <i>E.compacta</i> , <i>E.delavayi</i> ,<br><i>E.fargesii</i> , <i>E.fraxinifolia</i> , <i>E.glabrifolia</i> ,<br><i>E.rutaecarpa</i>                                                                   | 503.20078        | 18.5426<br>2 | C <sub>26</sub> H <sub>30</sub> O <sub>10</sub>               | [M+H] <sup>+</sup> |
| Terpene   | limonins                           | euodirutaecins B                                                          | <i>E.fargesii</i> , <i>E.glabrifolia</i>                                                                                                                                                                                         | 517.35150        | 75.2703<br>8 | C <sub>26</sub> H <sub>28</sub> O <sub>11</sub>               | [M+H] <sup>+</sup> |
| Terpene   | limonins                           | euodirutaecins A                                                          | <i>E.austrosinensis</i> , <i>E.fargesii</i> , <i>E.fraxinifolia</i> ,<br><i>E.glabrifolia</i>                                                                                                                                    | 517.37317        | 66.3468<br>1 | C <sub>26</sub> H <sub>28</sub> O <sub>11</sub>               | [M+H] <sup>+</sup> |
| Alkaloids | Indole<br>quinazoline<br>alkaloids | 13-methyl-13H-indolo [2',<br>3':3,<br>4]pyrido[2,1,β]quinazolin-<br>5-one | <i>E.austrosinensis</i> , <i>E.fargesii</i> , <i>E.glabrifolia</i>                                                                                                                                                               | 300.35172        | 49.6538<br>4 | C <sub>19</sub> H <sub>13</sub> N <sub>3</sub> O              | [M+H] <sup>+</sup> |
| Alkaloids | Indole                             | 13β-acetongl-hydroxy-                                                     | <i>E.fargesii</i> , <i>E.rutaecarpa</i>                                                                                                                                                                                          | 360.44376        | 24.3485      | C <sub>22</sub> H <sub>21</sub> N <sub>3</sub> O <sub>2</sub> | [M+H] <sup>+</sup> |

| Class I        | Class II                        | Compounds                                                                      | Species              | Molecular Weight | Rt (min)     | Formula                                                       | Ionization model   |
|----------------|---------------------------------|--------------------------------------------------------------------------------|----------------------|------------------|--------------|---------------------------------------------------------------|--------------------|
|                | quinazoline alkaloids           | evodiamine                                                                     |                      |                  | 9            |                                                               |                    |
| Alkaloids      | Indole<br>quinazoline alkaloids | 7 $\beta$ -hydroxyrutaecarpine                                                 | <i>E.glabrifolia</i> | 304.32721        | 18.3454<br>1 | C <sub>18</sub> H <sub>13</sub> N <sub>3</sub> O <sub>2</sub> | [M+H] <sup>+</sup> |
| Phenolic acids | Flavonoids                      | sinapyl alcohol 9- <i>O</i> -feruloyl-4- <i>O</i> - $\beta$ -D-glucopyranoside | <i>E.glabrifolia</i> | 549.56239        | 29.6759<br>4 | C <sub>27</sub> H <sub>32</sub> O <sub>12</sub>               | [M+H] <sup>+</sup> |
